# Supplementary material
Source: PubMed Central journal article supplement (PMC4736736)
Supplement: NIHMS753955-supplement-Supp_Tables.pdf [file NIHMS753955-supplement-Supp_Tables.pdf]

## Supplemental Information

**SUPPLEMENTAL TABLE 4** Mean Caffeine Intake Over the Study Period Among 2- to 22-Year-Olds, Including Nonconsumers

|                               | 1999–2000    | 2001–2002   | 2003–2004   | 2005–2006   | 2007–2008    | 2009–2010   |
|-------------------------------|--------------|-------------|-------------|-------------|--------------|-------------|
| Overall                       | 56.3 ± 6.7   | 46.2 ± 2.3  | 50.8 ± 3.8  | 43.4 ± 3    | 49.8 ± 2.7   | 41.9 ± 3.6  |
| Gender                        |              |             |             |             |              |             |
| Male                          | 62.0 ± 11.3  | 53.8 ± 3.3  | 56.1 ± 4.8  | 52.0 ± 5.2  | 51.4 ± 4.1   | 46.8 ± 5.5  |
| Female                        | 50.4 ± 2.5   | 38.7 ± 2.8  | 45.0 ± 3.6  | 34.6 ± 2.7  | 48.3 ± 3.4   | 36.9 ± 3.5  |
| Age                           |              |             |             |             |              |             |
| 2–5 years <sup>a</sup>        | 11.0 ± 1.4   | 13.2 ± 2.5  | 14 ± 3.9    | 7.7 ± 0.5   | 8.3 ± 1.0    | 5.8 ± 0.4   |
| 6–11 years <sup>b</sup>       | 28.3 ± 5.8   | 23.2 ± 1.8  | 31.3 ± 3.1  | 18.3 ± 1.6  | 24.5 ± 3.0   | 17.2 ± 1.1  |
| 12–16 years                   | 62.1 ± 3.7   | 48.9 ± 4.5  | 50.7 ± 2.5  | 43.0 ± 3.2  | 53.6 ± 4.3   | 48.4 ± 8.0  |
| 17–18 years                   | 93.2 ± 12.2  | 77.8 ± 5.5  | 74.0 ± 9.2  | 86.4 ± 16.2 | 102.9 ± 27.6 | 69.4 ± 5.9  |
| 19–22 years                   | 112.8 ± 18.0 | 92.6 ± 9.8  | 97.2 ± 13.0 | 92.9 ± 11.3 | 93.5 ± 15.9  | 90.3 ± 7.1  |
| Race/ethnicity                |              |             |             |             |              |             |
| Non-Hispanic white            | 63.1 ± 8.3   | 52.1 ± 3.5  | 61 ± 5.3    | 53.2 ± 4.7  | 65.1 ± 4.4   | 51.3 ± 5.6  |
| Non-Hispanic black            | 24.1 ± 2.2   | 21.6 ± 1.8  | 22.8 ± 2.3  | 24.9 ± 2.6  | 20.8 ± 2.7   | 24.6 ± 3.1  |
| Mexican American <sup>b</sup> | 38.8 ± 1.9   | 37.2 ± 3.3  | 38.3 ± 4.8  | 27.9 ± 3.2  | 30.0 ± 3.3   | 31.3 ± 2.7  |
| PIR                           |              |             |             |             |              |             |
| 0%–99% of FPT                 | 62.7 ± 8.9   | 39.0 ± 3.8  | 45.5 ± 5.3  | 46.2 ± 11.8 | 53.7 ± 10    | 41.9 ± 3.8  |
| 100%–199% of FPT              | 65.9 ± 18.8  | 49.4 ± 6.0  | 46.4 ± 6.8  | 43.9 ± 7.0  | 56.5 ± 9.7   | 45.4 ± 6.0  |
| 200%–299% of FPT              | 50.7 ± 5.3   | 44.2 ± 6.5  | 45.1 ± 7.5  | 37.7 ± 3.6  | 44.1 ± 5.8   | 38.3 ± 5.4  |
| 300%–399% of FPT              | 46.5 ± 6.2   | 60.2 ± 13.3 | 61.5 ± 9.5  | 42.8 ± 5.0  | 44.1 ± 10.6  | 50.0 ± 15.5 |
| ≥400% of FPT                  | 54.2 ± 5.5   | 42.5 ± 5.0  | 57.6 ± 7.3  | 44.1 ± 6.0  | 46.8 ± 6.0   | 35.7 ± 5.1  |

Data are presented as means  $\pm$  SEs. The significance of sociodemographic differences and trends was assessed by using zero-inflated negative binomial models to account for the zero-inflated and positively skewed distribution of overall caffeine intake. FPT, federal poverty threshold.

<sup>a</sup> Indicates linear trend,  $P < .001$ .

<sup>b</sup> Indicates linear trend,  $P < .01$ .

**SUPPLEMENTAL TABLE 5** Mean Caffeine Intake Among Consumers by Age and by Food/Beverage Category: NHANES 1999–2010

|                              | 1999–2000   | 2001–2002  | 2003–2004   | 2005–2006   | 2007–2008   | 2009–2010  |
|------------------------------|-------------|------------|-------------|-------------|-------------|------------|
| <b>All ages, mg/d</b>        |             |            |             |             |             |            |
| Flavored dairy               | 1.6 ± 0.1   | 1.6 ± 0.1  | 1.4 ± 0.1   | 1.3 ± 0.1   | 1.4 ± 0.1   | 1.6 ± 0.1  |
| Sweetened grains             | 1.5 ± 0.2   | 1.5 ± 0.1  | 1.4 ± 0.1   | 1.6 ± 0.2   | 1.3 ± 0.1   | 1.8 ± 0.1  |
| Sugars/sweets                | 1.1 ± 0.1   | 1.4 ± 0.1  | 1.3 ± 0.2   | 1.0 ± 0.1   | 1.0 ± 0.1   | 0.9 ± 0.1  |
| Coffee <sup>a</sup>          | 7.5 ± 1.9   | 7.5 ± 1.3  | 12.4 ± 2.7  | 9.2 ± 1.7   | 17.1 ± 2.0  | 13.6 ± 2.3 |
| Tea                          | 17.2 ± 3.9  | 14.0 ± 1.8 | 13.2 ± 2.4  | 16.3 ± 2.7  | 19.2 ± 2.7  | 14.5 ± 3.1 |
| Soda <sup>a</sup>            | 47.1 ± 4.2  | 36.6 ± 1.7 | 37.0 ± 2.7  | 29.7 ± 1.8  | 25.6 ± 3.3  | 22.3 ± 1.5 |
| Energy drinks <sup>a</sup>   | 0.0 ± 0.0   | 0.2 ± 0.1  | 0.4 ± 0.2   | 0.9 ± 0.3   | 3.5 ± 0.7   | 3.2 ± 1.1  |
| <b>2–5 years, mg/d</b>       |             |            |             |             |             |            |
| Flavored dairy <sup>d</sup>  | 1.8 ± 0.3   | 2.1 ± 0.2  | 2.0 ± 0.2   | 1.5 ± 0.2   | 2.0 ± 0.2   | 1.7 ± 0.1  |
| Sweetened grains             | 1.4 ± 0.2   | 1.3 ± 0.1  | 1.4 ± 0.3   | 1.2 ± 0.2   | 1.0 ± 0.1   | 1.5 ± 0.2  |
| Sugars/sweets                | 0.9 ± 0.2   | 0.5 ± 0.1  | 0.5 ± 0.1   | 0.8 ± 0.2   | 0.7 ± 0.1   | 0.7 ± 0.1  |
| Coffee                       | 0.4 ± 0.3   | 0.2 ± 0.1  | 0.8 ± 0.7   | 0.7 ± 0.3   | 0.8 ± 0.5   | 0.5 ± 0.2  |
| Tea                          | 4.7 ± 1.8   | 7.5 ± 2.5  | 10.1 ± 4.3  | 2.9 ± 0.3   | 4.2 ± 0.9   | 3.0 ± 0.7  |
| Soda <sup>a</sup>            | 8.2 ± 1.0   | 9.1 ± 1.7  | 6.9 ± 1.4   | 5.2 ± 0.8   | 4.3 ± 0.8   | 2.7 ± 0.5  |
| Energy drinks                | 0.0 ± 0.0   | 0.0 ± 0.0  | 0.1 ± 0.1   | 0.0 ± 0.0   | 0.0 ± 0.0   | 0.0 ± 0.0  |
| <b>6–11 years, mg/d</b>      |             |            |             |             |             |            |
| Flavored dairy               | 1.9 ± 0.2   | 2.3 ± 0.3  | 2.1 ± 0.2   | 2.2 ± 0.2   | 2.0 ± 0.1   | 2.2 ± 0.2  |
| Sweetened grains             | 1.7 ± 0.2   | 1.5 ± 0.1  | 1.7 ± 0.2   | 2.3 ± 0.3   | 1.4 ± 0.1   | 2.0 ± 0.1  |
| Sugars/sweets                | 1.2 ± 0.2   | 1.4 ± 0.2  | 0.8 ± 0.2   | 1.0 ± 0.1   | 0.9 ± 0.1   | 1.0 ± 0.1  |
| Coffee                       | 0.9 ± 0.4   | 1.7 ± 1.1  | 0.6 ± 0.2   | 1.1 ± 0.5   | 2.7 ± 0.9   | 1.9 ± 0.6  |
| Tea                          | 9.9 ± 5.0   | 6.7 ± 1.1  | 7.6 ± 1.9   | 5.4 ± 1.0   | 10.0 ± 2.5  | 6.8 ± 1.7  |
| Soda <sup>a,c</sup>          | 23.8 ± 2.9  | 18.1 ± 1.8 | 25.0 ± 3.2  | 12.4 ± 1.6  | 14.9 ± 2.3  | 9.0 ± 0.7  |
| Energy drinks <sup>c</sup>   | 0.0 ± 0.0   | 0.0 ± 0.0  | 0.6 ± 0.5   | 0.0 ± 0.0   | 1.8 ± 1.0   | 0.0 ± 0.0  |
| <b>12–16 years, mg/d</b>     |             |            |             |             |             |            |
| Flavored dairy <sup>c</sup>  | 1.9 ± 0.2   | 1.7 ± 0.2  | 1.0 ± 0.2   | 1.0 ± 0.2   | 1.1 ± 0.2   | 1.6 ± 0.2  |
| Sweetened grains             | 1.7 ± 0.3   | 1.8 ± 0.1  | 1.4 ± 0.2   | 1.7 ± 0.2   | 1.5 ± 0.1   | 2.2 ± 0.4  |
| Sugars/sweets <sup>c</sup>   | 1.2 ± 0.1   | 1.1 ± 0.2  | 1.3 ± 0.2   | 1.2 ± 0.2   | 1.1 ± 0.2   | 0.8 ± 0.2  |
| Coffee <sup>b</sup>          | 4.1 ± 1.6   | 2.5 ± 0.5  | 7.1 ± 2.0   | 6.8 ± 1.2   | 15.3 ± 2.7  | 7.8 ± 2.1  |
| Tea                          | 19.4 ± 2.7  | 14.1 ± 2.1 | 15.5 ± 3.2  | 12.7 ± 1.2  | 17.6 ± 3.2  | 20.4 ± 8.4 |
| Soda <sup>a</sup>            | 51.7 ± 4.8  | 40.4 ± 3.7 | 42.3 ± 3.8  | 35.1 ± 3.1  | 31.8 ± 4.5  | 29.5 ± 4.6 |
| Energy drinks <sup>b</sup>   | 0.0 ± 0.0   | 0.4 ± 0.3  | 0.2 ± 0.2   | 1.0 ± 0.6   | 3.7 ± 1.7   | 2.0 ± 1.0  |
| <b>17–18 years, mg/d</b>     |             |            |             |             |             |            |
| Flavored dairy               | 0.9 ± 0.2   | 0.8 ± 0.1  | 0.9 ± 0.2   | 0.7 ± 0.2   | 1.2 ± 0.4   | 1.2 ± 0.3  |
| Sweetened grains             | 1.4 ± 0.4   | 1.6 ± 0.4  | 1.1 ± 0.2   | 1.2 ± 0.2   | 1.1 ± 0.2   | 1.1 ± 0.2  |
| Sugars/sweets                | 1.1 ± 0.2   | 1.2 ± 0.2  | 1.3 ± 0.3   | 0.9 ± 0.1   | 1.3 ± 0.4   | 1.4 ± 0.5  |
| Coffee <sup>b</sup>          | 18.2 ± 6.6  | 13.3 ± 4.5 | 23.1 ± 8.9  | 20.3 ± 9.9  | 35.5 ± 12.2 | 27.5 ± 4.9 |
| Tea                          | 24.2 ± 4.3  | 21.1 ± 3.8 | 15.7 ± 6.6  | 28.3 ± 8.8  | 42.2 ± 15.0 | 24.4 ± 5.5 |
| Soda <sup>a</sup>            | 75.8 ± 12.3 | 66.4 ± 5.6 | 50.0 ± 4.3  | 61.2 ± 11.4 | 38.5 ± 5.3  | 38.3 ± 6.3 |
| Energy drinks <sup>b,c</sup> | 0.0 ± 0.0   | 0.2 ± 0.2  | 0.3 ± 0.3   | 4.7 ± 3.1   | 11.1 ± 6.2  | 2.1 ± 1.1  |
| <b>19–22 years, mg/d</b>     |             |            |             |             |             |            |
| Flavored dairy               | 1.1 ± 0.3   | 0.6 ± 0.1  | 0.5 ± 0.2   | 0.6 ± 0.1   | 0.6 ± 0.3   | 0.7 ± 0.2  |
| Sweetened grains             | 1.1 ± 0.3   | 1.3 ± 0.6  | 1.0 ± 0.3   | 0.9 ± 0.2   | 1.1 ± 0.2   | 1.3 ± 0.3  |
| Sugars/sweets                | 1.0 ± 0.3   | 2.8 ± 0.7  | 2.5 ± 0.7   | 1.1 ± 0.2   | 1.0 ± 0.2   | 0.9 ± 0.2  |
| Coffee <sup>a</sup>          | 19.8 ± 6.4  | 25.8 ± 6.2 | 38.1 ± 10.4 | 24.2 ± 5.6  | 42.4 ± 9.9  | 39.8 ± 6.5 |
| Tea <sup>d</sup>             | 30.0 ± 7.6  | 26.6 ± 8.2 | 19.6 ± 7.0  | 39.9 ± 12.0 | 34.2 ± 5.2  | 21.8 ± 3.5 |
| Soda <sup>a</sup>            | 86.7 ± 9.4  | 65.8 ± 7.3 | 63.3 ± 6.1  | 50.5 ± 5.0  | 43.3 ± 9.1  | 39.0 ± 4.7 |
| Energy drinks <sup>b</sup>   | 0.0 ± 0.0   | 0.2 ± 0.2  | 0.6 ± 0.6   | 0.7 ± 0.4   | 4.6 ± 1.8   | 12.0 ± 3.9 |

Data are presented as means +/- SEs.

<sup>a</sup> Indicates significant linear trend,  $P < .001$ .

<sup>b</sup> Indicates significant linear trend,  $P < .01$ .

<sup>c</sup> Indicates significant quadratic trend,  $P < .05$ .

<sup>d</sup> Indicates significant linear trend,  $P < .05$ .

**SUPPLEMENTAL TABLE 6** Proportion of Total Caffeine Intake From Different Sources, by Race/  
Ethnicity: NHANES 1999–2010

|                            | 1999–2000  | 2001–2002  | 2003–2004  | 2005–2006  | 2007–2008  | 2009–2010  |
|----------------------------|------------|------------|------------|------------|------------|------------|
| <b>Non-Hispanic white</b>  |            |            |            |            |            |            |
| Flavored dairy             | 1.9 ± 0.4  | 2.5 ± 0.2  | 1.8 ± 0.3  | 1.9 ± 0.3  | 1.6 ± 0.2  | 2.2 ± 0.4  |
| Sweetened grains           | 2.0 ± 0.4  | 2.2 ± 0.2  | 1.8 ± 0.3  | 2.3 ± 0.4  | 1.4 ± 0.2  | 2.8 ± 0.4  |
| Sugars/sweets              | 1.5 ± 0.2  | 2.2 ± 0.4  | 1.6 ± 0.4  | 1.6 ± 0.2  | 1.1 ± 0.2  | 1.5 ± 0.3  |
| Coffee <sup>a</sup>        | 7.0 ± 1.7  | 12.8 ± 2.8 | 16.6 ± 3.4 | 15.9 ± 3.2 | 24.1 ± 3.3 | 22.8 ± 3.8 |
| Tea                        | 23.9 ± 3.5 | 22.9 ± 2.5 | 19.5 ± 3.7 | 26.9 ± 3.9 | 28.8 ± 4.2 | 23.3 ± 5.8 |
| Soda <sup>a</sup>          | 63.6 ± 3.6 | 57.0 ± 2.8 | 57.7 ± 3.1 | 49.6 ± 3.6 | 37.0 ± 5.8 | 41.2 ± 4.9 |
| Energy drinks <sup>a</sup> | 0.0 ± 0.0  | 0.3 ± 0.2  | 0.6 ± 0.4  | 1.6 ± 0.6  | 5.9 ± 1.3  | 5.8 ± 1.9  |
| <b>Non-Hispanic black</b>  |            |            |            |            |            |            |
| Flavored dairy             | 3.3 ± 0.5  | 4.0 ± 0.5  | 2.7 ± 0.4  | 2.7 ± 0.4  | 2.9 ± 0.4  | 3.5 ± 0.9  |
| Sweetened grains           | 3.8 ± 0.5  | 4.3 ± 0.8  | 4.1 ± 0.4  | 3.7 ± 0.5  | 4.1 ± 0.9  | 4.0 ± 0.6  |
| Sugars/sweets              | 2.7 ± 0.7  | 4.5 ± 1.1  | 2.9 ± 0.6  | 2.0 ± 0.4  | 2.0 ± 0.6  | 2.0 ± 0.4  |
| Coffee <sup>b,c</sup>      | 8.2 ± 2.9  | 5.9 ± 2.1  | 6.8 ± 2.2  | 5.7 ± 3    | 25.4 ± 7.4 | 19.8 ± 5.5 |
| Tea <sup>b</sup>           | 22.1 ± 4.8 | 18.9 ± 4.1 | 29.4 ± 3.9 | 38.4 ± 6.7 | 28.5 ± 5.4 | 36.6 ± 6.2 |
| Soda <sup>a</sup>          | 59.9 ± 3.8 | 61.1 ± 5.1 | 53.9 ± 4.8 | 45.8 ± 5.5 | 34.2 ± 3.5 | 29.1 ± 5.2 |
| Energy drinks <sup>a</sup> | 0.0 ± 0.0  | 0.0 ± 0.0  | 0.2 ± 0.1  | 1.5 ± 1.1  | 2.8 ± 1.1  | 4.1 ± 2.9  |
| <b>Mexican American</b>    |            |            |            |            |            |            |
| Flavored dairy             | 3.9 ± 0.3  | 3.4 ± 0.6  | 3.1 ± 0.6  | 3.7 ± 0.5  | 4.4 ± 0.6  | 4.5 ± 0.7  |
| Sweetened grains           | 2.7 ± 0.3  | 2.6 ± 0.4  | 2.2 ± 0.4  | 3.4 ± 0.6  | 3.0 ± 0.4  | 3.4 ± 0.6  |
| Sugars/sweets              | 1.3 ± 0.2  | 1.6 ± 0.3  | 2.8 ± 1.1  | 1.6 ± 0.3  | 2.3 ± 0.7  | 1.5 ± 0.3  |
| Coffee <sup>a</sup>        | 11.6 ± 2.4 | 11.8 ± 1.6 | 18.3 ± 5.9 | 21.5 ± 2.1 | 27.1 ± 4.5 | 24.0 ± 4.8 |
| Tea                        | 17.8 ± 3.1 | 14.5 ± 5.0 | 16.3 ± 4.3 | 19.4 ± 4.1 | 20.4 ± 3.4 | 22.1 ± 5.2 |
| Soda <sup>a</sup>          | 62.4 ± 2.5 | 65.7 ± 4.3 | 56.6 ± 2.2 | 49 ± 3.8   | 41.8 ± 7.5 | 41.0 ± 5.2 |
| Energy drinks              | 0.0 ± 0.0  | 0.5 ± 0.1  | 0.6 ± 0.4  | 1.3 ± 0.5  | 0.8 ± 0.6  | 3.5 ± 1.8  |

Data are presented as proportions +/- SEs.

<sup>a</sup> Indicates significant linear trend,  $P < .001$ .

<sup>b</sup> Indicates significant linear trend,  $P < .05$ .

<sup>c</sup> Indicates significant quadratic trend,  $P < .05$ .
